# Supplementary material for: Extracellular vesicles derived from lung M2 macrophages enhance group 2 innate lymphoid cells function in allergic airway inflammation
Source: Research Square preprint supplement (doi:10.21203/rs.3.rs-5613639/v1), 2024-12-23

**Extracellular vesicles derived from lung M2 macrophages enhances ILC2s function in allergic airway inflammation**

**Kun Lv1,2,4+, Yingying Zhang3+,Guoquan Yin1,2,5+, Xueqin Li1,2,4, Min Zhong1,2,4, Xiaolong Zhu1,2,4# and Weiya Pei1,2,4#**

1 Central Laboratory, The first affiliated hospital of Wannan Medical College, Wuhu, PR China; 2 Anhui Province Key Laboratory of Non-coding RNA Basic and Clinical Transformation (Wannan Medical College), Wuhu, PR China; 3 Department of Laboratory Medicine, The first affiliated hospital of Wannan Medical College, Wuhu, PR China; 4 Clinical Research Center for Critical Respiratory Medicine of Anhui Province, Wuhu, PR China; 5 Yangzhou Blood Center, Yangzhou, PR China.

*** Address correspondence to:** Weiya Pei, Central Laboratory of the first affiliated hospital, Wannan Medical College, 2 Zheshan western road, Wuhu, 241001, PR China. **[Tel:](Tel:+86)** [+86](Tel:+86)-553-5739912; **Fax:** [+86](Tel:+86)-553-5739209; **Email:** pwy730@126.com

**Running title:** M2 macrophages-derived extracellular vesicles promote ILC2s activation in allergic airway inflammation

**+These authors contributed equally to this work.**

***Corresponding author:**

Weiya Pei - Central Laboratory, The First Affiliated hospital of Wannan Medical College, Wuhu, PR China. Email: pwy730@126.com.

Xiaolong Zhu - Central Laboratory, The First Affiliated hospital of Wannan Medical College, Wuhu, PR China. Email: [zhuxlon3@126.com](mailto:zhuxlon3@126.com).

**Supplementary tables and figures**

**Table S1** Primers used for qPCR

| **List of oligonucleotide sequences** | **5'>3'** |
| --- | --- |
| GAPDH (human)-F | ACCATCTTCCAGGAGCGAGAT |
| GAPDH (human)-R | GGGCAGAGATGATGACCCTTT |
| GAPDH (mouse)-F | AGGTCGGTGTGAACGGATTTG |
| GAPDH (mouse)-R | TGTAGACCATGTAGTTGAGGTCA |
| 4930474H06RiK (mouse)-F | GGAGAAGCCTGGCAGCATTCAC |
| 4930474H06RiK (mouse)-R | AGACCCGCACCATTCCAAGTTTAC |
| 4930474H06RiK (human)-F | CCACTAACGATGGGGTGGAC |
| 4930474H06RiK (human)-R | GGGTGCTGTTAGGAGCTGTT |
| GATA3 (mouse)-F | TCTGGAGGAGGAACGCTAATGGG |
| GATA3 (mouse)-R | CGGGTCTGGATGCCTTCTTTCTTC |
| GLUT1 (mouse)-F | AAGAAGAGGGTCGGCAGATGATG |
| GLUT1 (mouse)-R | AGCACCACAGCGATGAGGATG |
| LDHA (mouse)-F | CGGCTGGGTCCTGGGAGAAC |
| LDHA(mouse)-R | ACCTCCTTCCACTGCTCCTTGTC |
| HK2 (mouse)-F | TGATCGCCTGCTTATTCACGG |
| HK2(mouse)-R | AACCGCCTAGAAATCTCCAGA |
| PKM2 (mouse)-F | GGGCCATAATCGTCCTCACC |
| PKM2 (mouse)-R | TTGCACAGCACAGGGAAGAT |
| CD206 (mouse)-F | GGAGTGGCAGGTGGCTTAT |
| CD206 (mouse)-R | TGGACATTTGGGTTCAGGAG |
| Arg-1(mouse)-R | CGACATCAAAGCTCAGGTGAATCGG |
| Arg-1 (human)-F | TCTTCTTGACTTCTGCCACCTTGC |
| ST2 (mouse)-F | GGCACACCATAAGGCTGAGAAGG |
| ST2 (mouse)-R | CTCCAGAACAGAGCAACCTCAATCC |
| Sca-1 (mouse)-F | TCCCATTTGAGACTTCTTGCCCATC |
| Sca-1 (mouse)-R | CCACAATAACTGCTGCCTCCTGAG |
| ICOS (mouse)-F | GAAGTCCTCTGCGAACTCACCAAG |
| ICOS (mouse)-R | CTGGGAGCTGTCTGGGTTGTTTAG |

**Table S2. Oligonucleotides sequences used in lncRNA 4930474H06RiK are written.**

| **Genes** | **Target sequences** |
| --- | --- |
| 4930474H06RiK(Smart silencer mix) | GAAGCCTGGCAGCATTCACG(ASO)  CAAAGACAGTGACGTCAACT(ASO)  GGACAAAGCATCCAAGTGCT (ASO)  GAAGTGGGACATCTGTCAT(siRNA)  TCCAAGTGCTTGAGACTGT(siRNA)  GGTCTTGAACCCTCAAAGA(siRNA) |


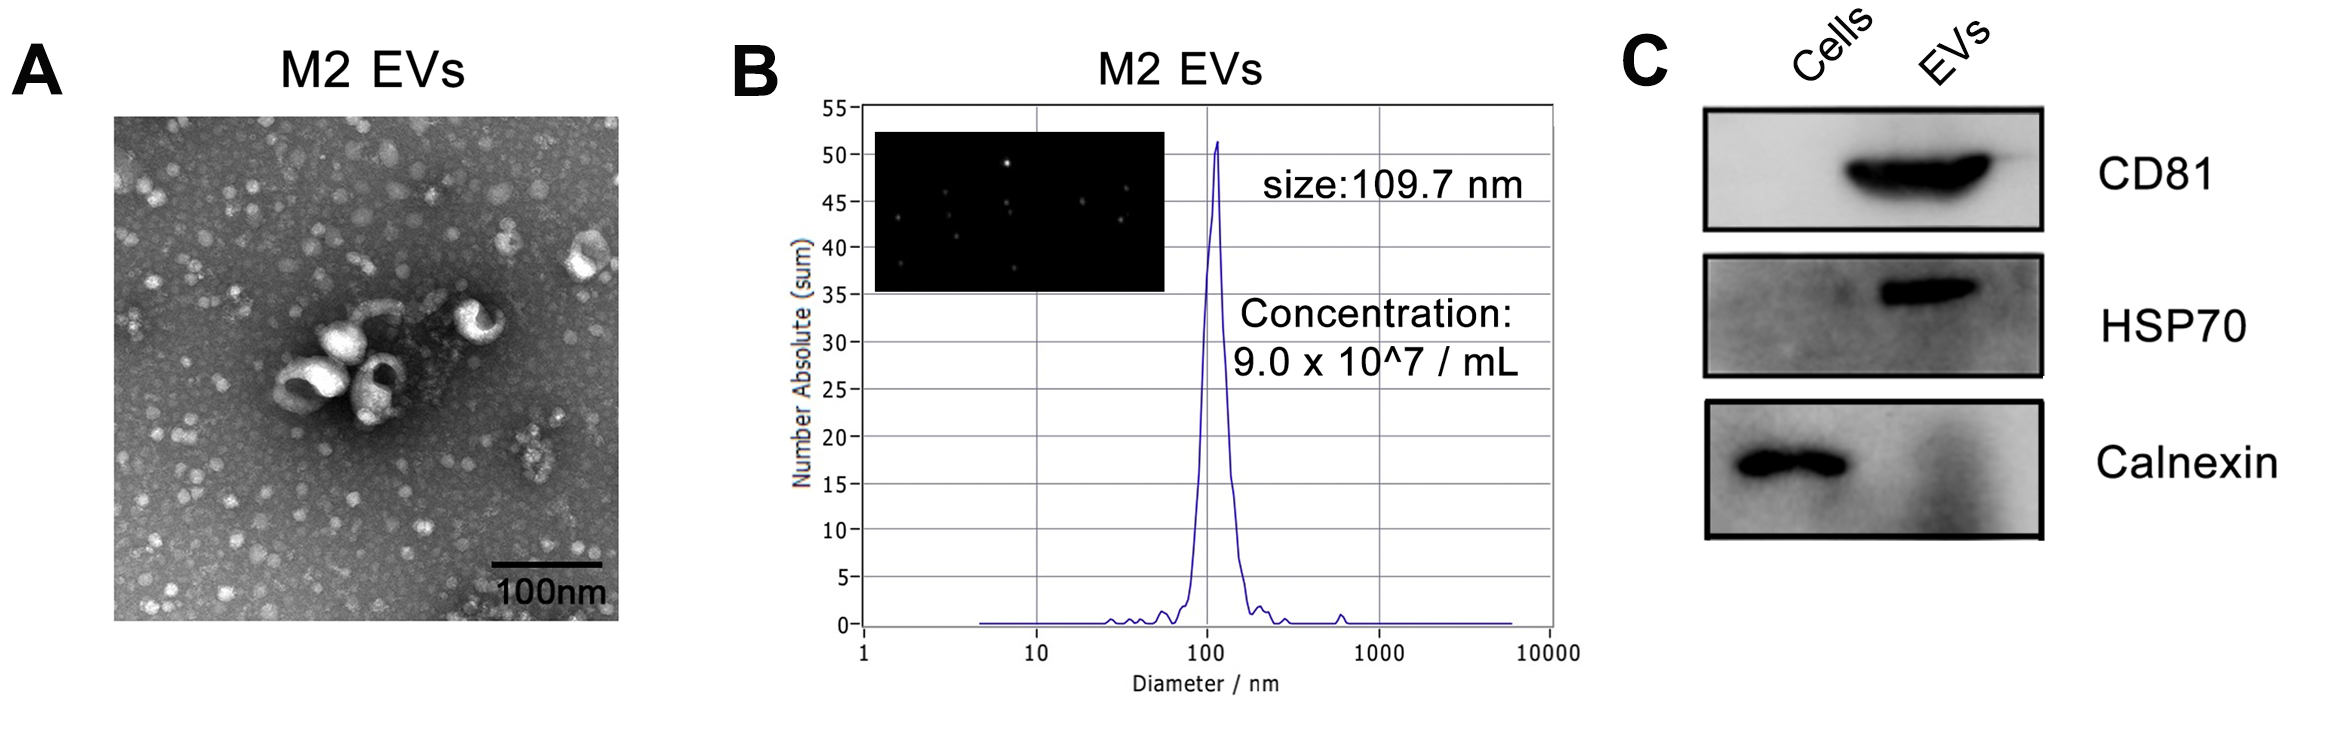


**Fig S1. Verification of M2 EVs from IL-4 treated BMDMs.** (**A**) TEM of M2 EVs. (**B**) Representative results of nanoparticle tracking analyses (NTA) of M2 EVs. (C) Western blot analysis of CD81, HSP70 and Calnexin of M2 EVs from lung tissues. Unedited full blots were in Fig S7.


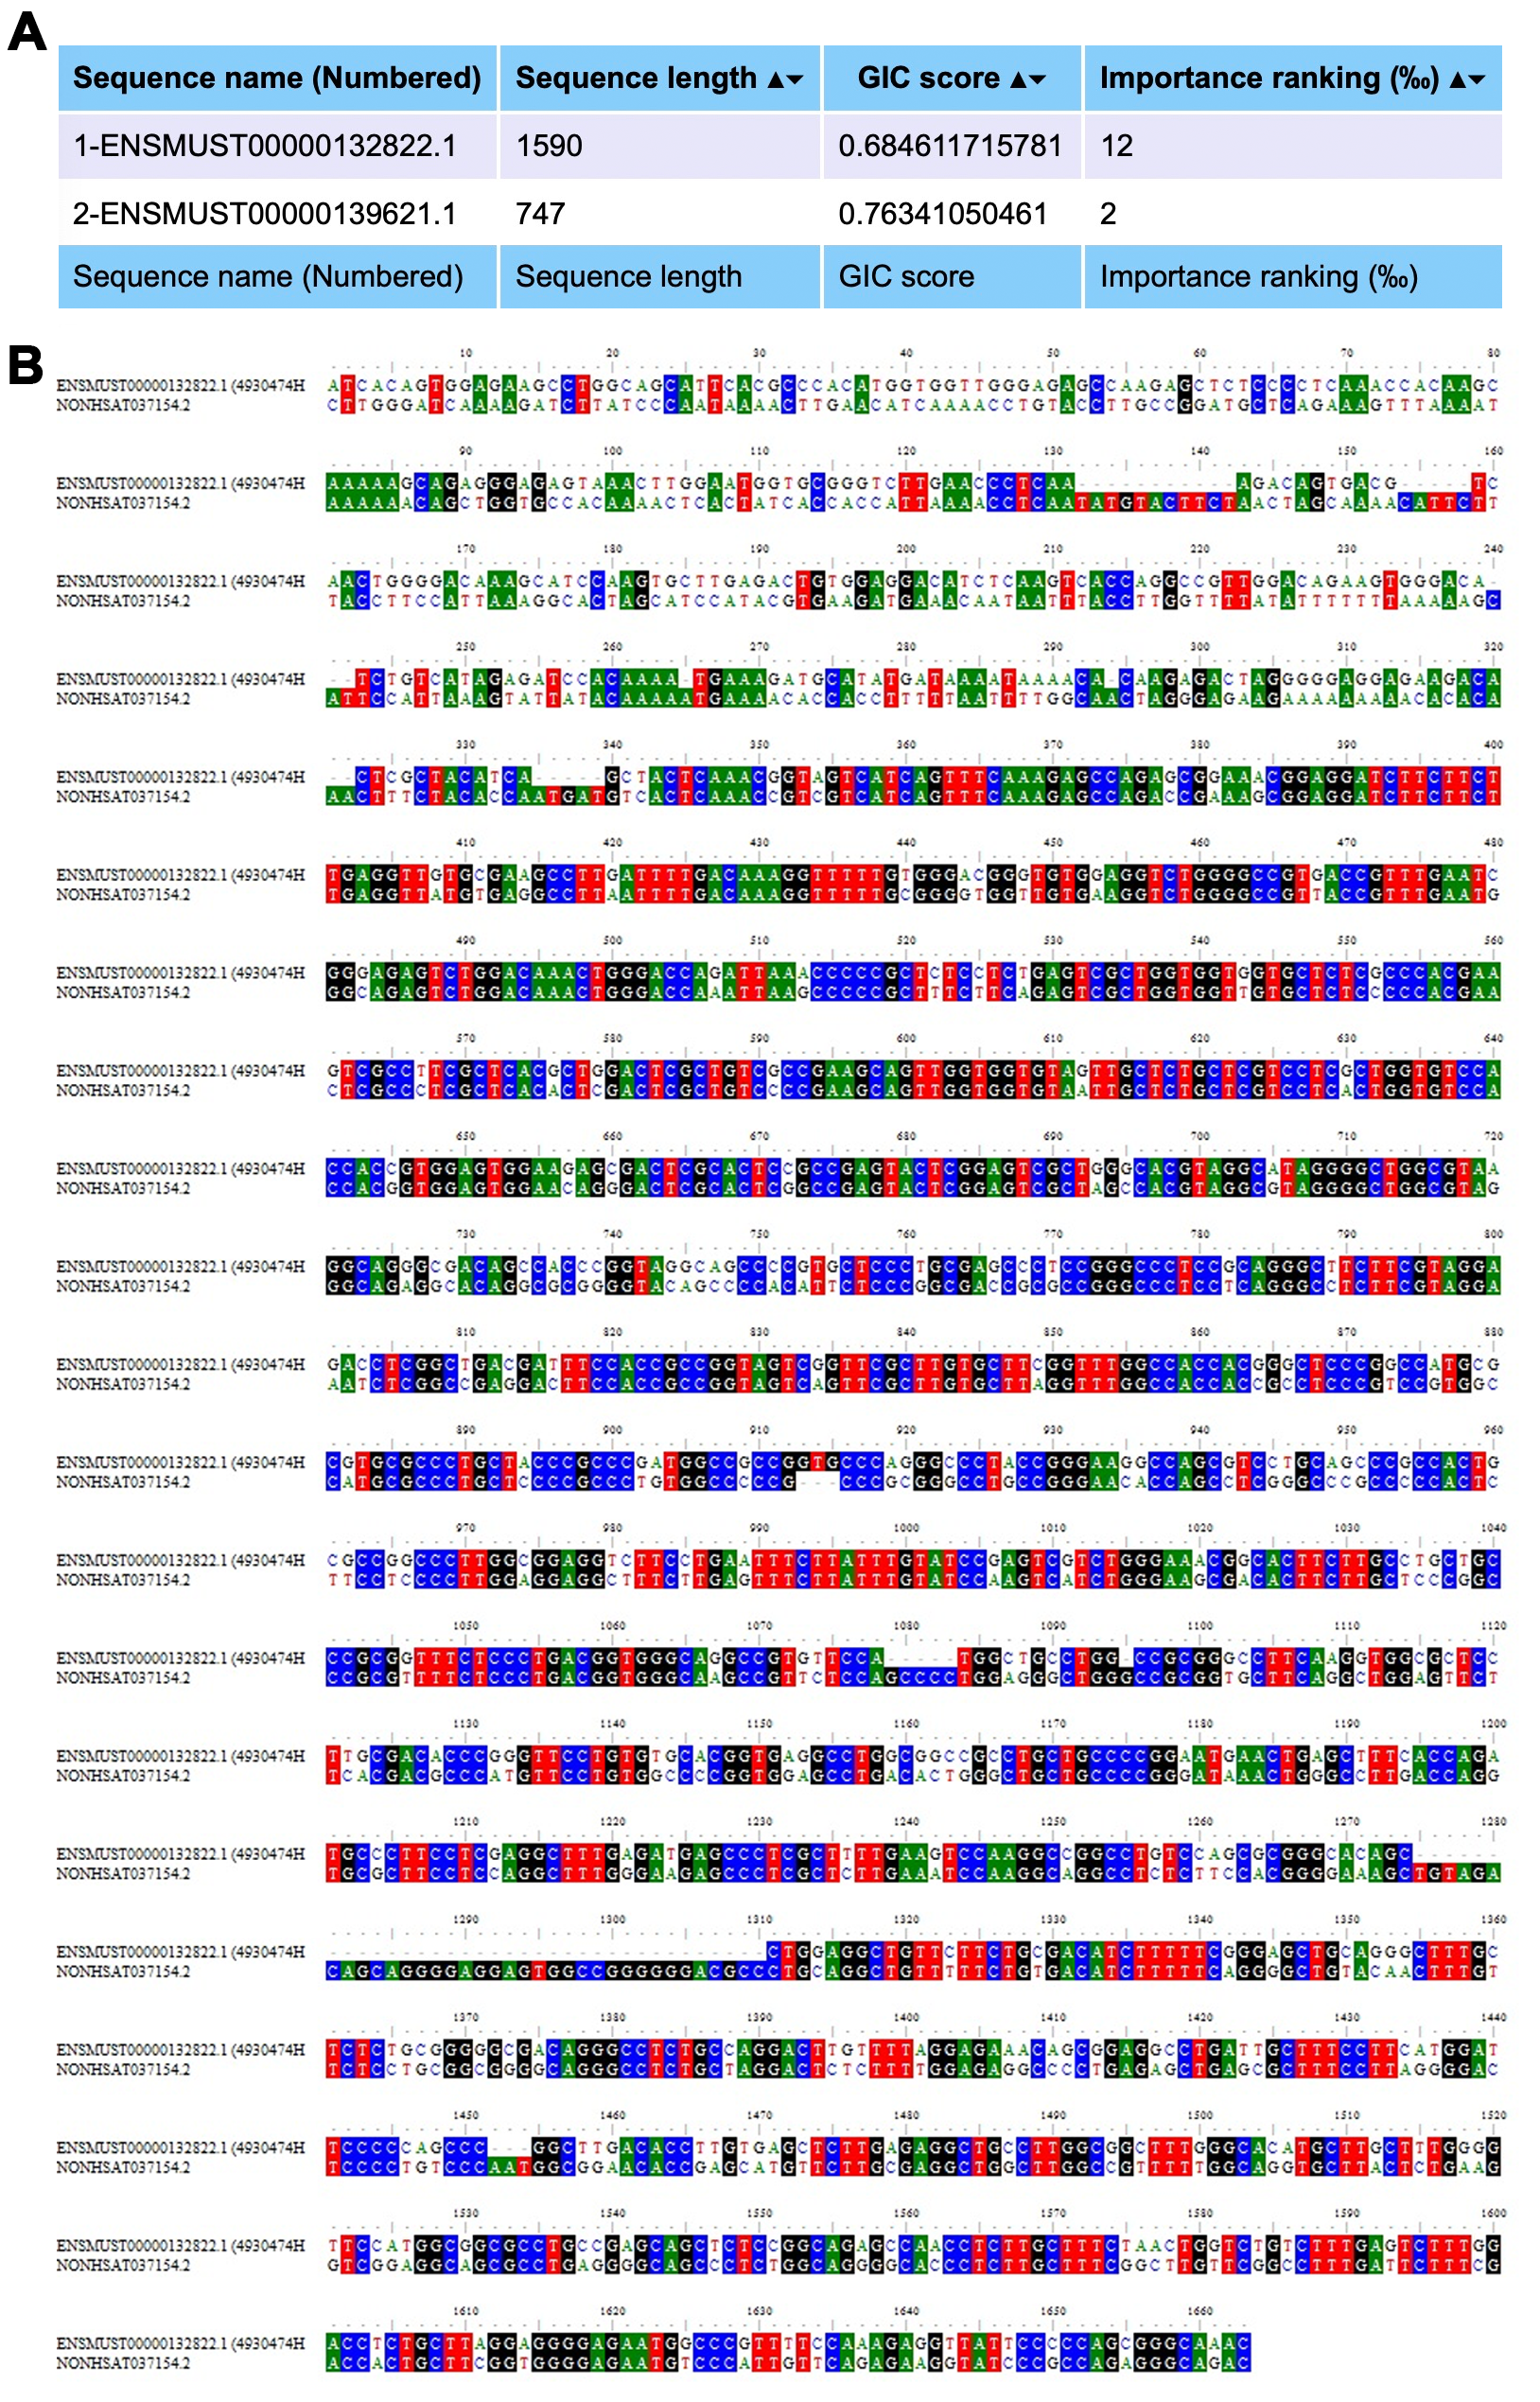


**Fig S2.** **Analyses of the Gene Importance Calculator (GIC, www.cuilab.cn) and sequence alignment.** (**A**) GIC analysis of ENSMUST00000132822 (4930474H06Rik) and ENSMUST00000139621 (1700028N14Rik). (**B**) Alignment of ENSMUST00000132822 (4930474H06Rik, mouse) and NONHSAT037154 (human) sequences.


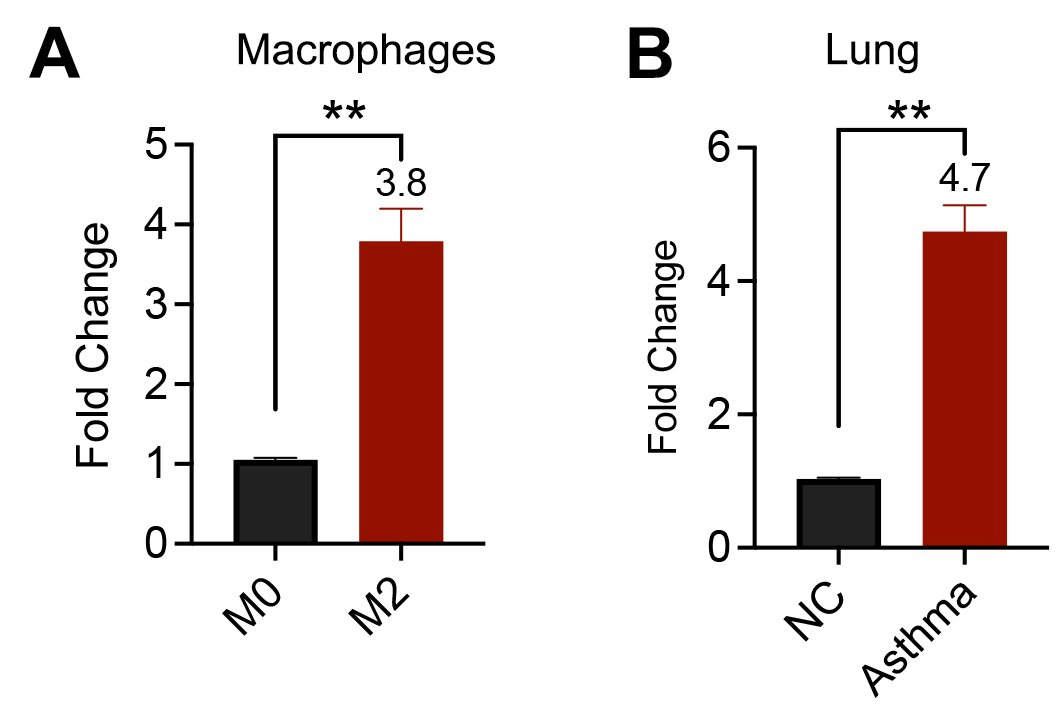


**Fig S3.** **Expression of 4930474H06Rik in BMDMs and lungs of asthamtic mice.** (**A**) Expression of 4930474H06Rik in M0 and M2 macrophages. Primary BMDMs were stimulated with IL-4 (20 ng/mL) for 48 hours. RNA was extracted from the two groups of cells and subjected to RT-qPCR analysis with primers specific to 4930474H06Rik. GAPDH was set as the endogenous control. (**B**) Expression of 4930474H06Rik in lung tissues of astham (n = 7-10 mice for each group). Data are presented as mean ± SEM and are representative of at least 3 independent experiments. **P < 0.01.


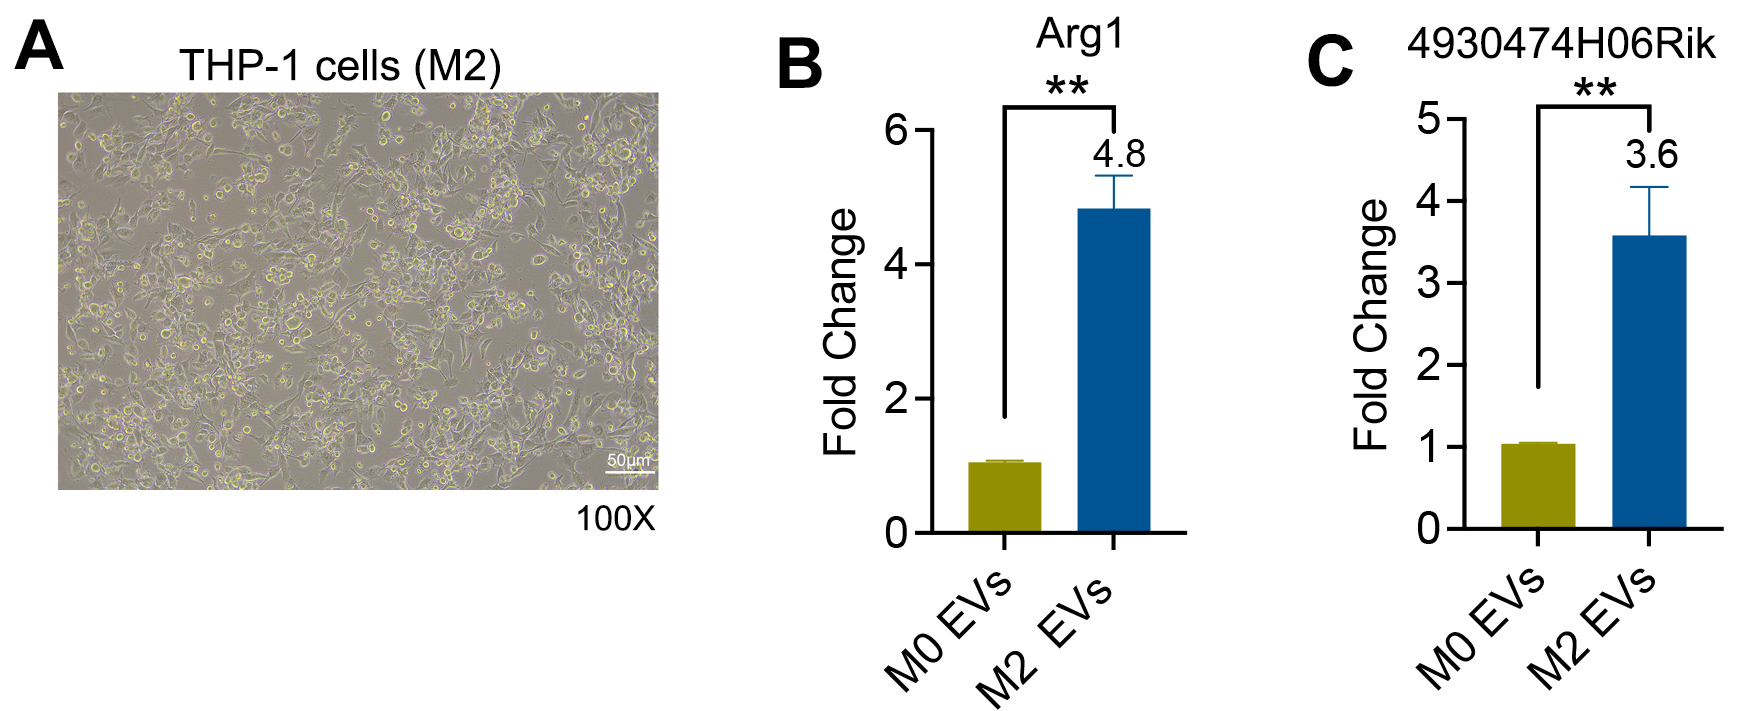


**Fig S4.** **Expression of 4930474H06Rik in EVs of THP-1 cells.** **(A)** Macrophages were induced using THP-1 cells treated with phorbol 12-myristate 13-acetate (PMA) (500 ng/mL, 48 hours) and then stimulated with IL-4 (20 ng/mL) and IL-13 (20 ng/mL). After 72 hours of stimulation, the morphology of THP-1 cells (M2) was observed by microscope. **(B)** Analyses of the expression of the M2-associated genes in M0 and M2 EVs (THP-1 cells) by RT-qPCR. **(C)** Analyses of the expression of the 4930474H06Rik in M0 and M2 EVs (THP-1 cells) by RT-qPCR. Data are presented as mean ± SEM and are representative of at least 3 independent experiments. **P < 0.01.

**Fig S5. Unedited full blots for Figure 2C.**

**
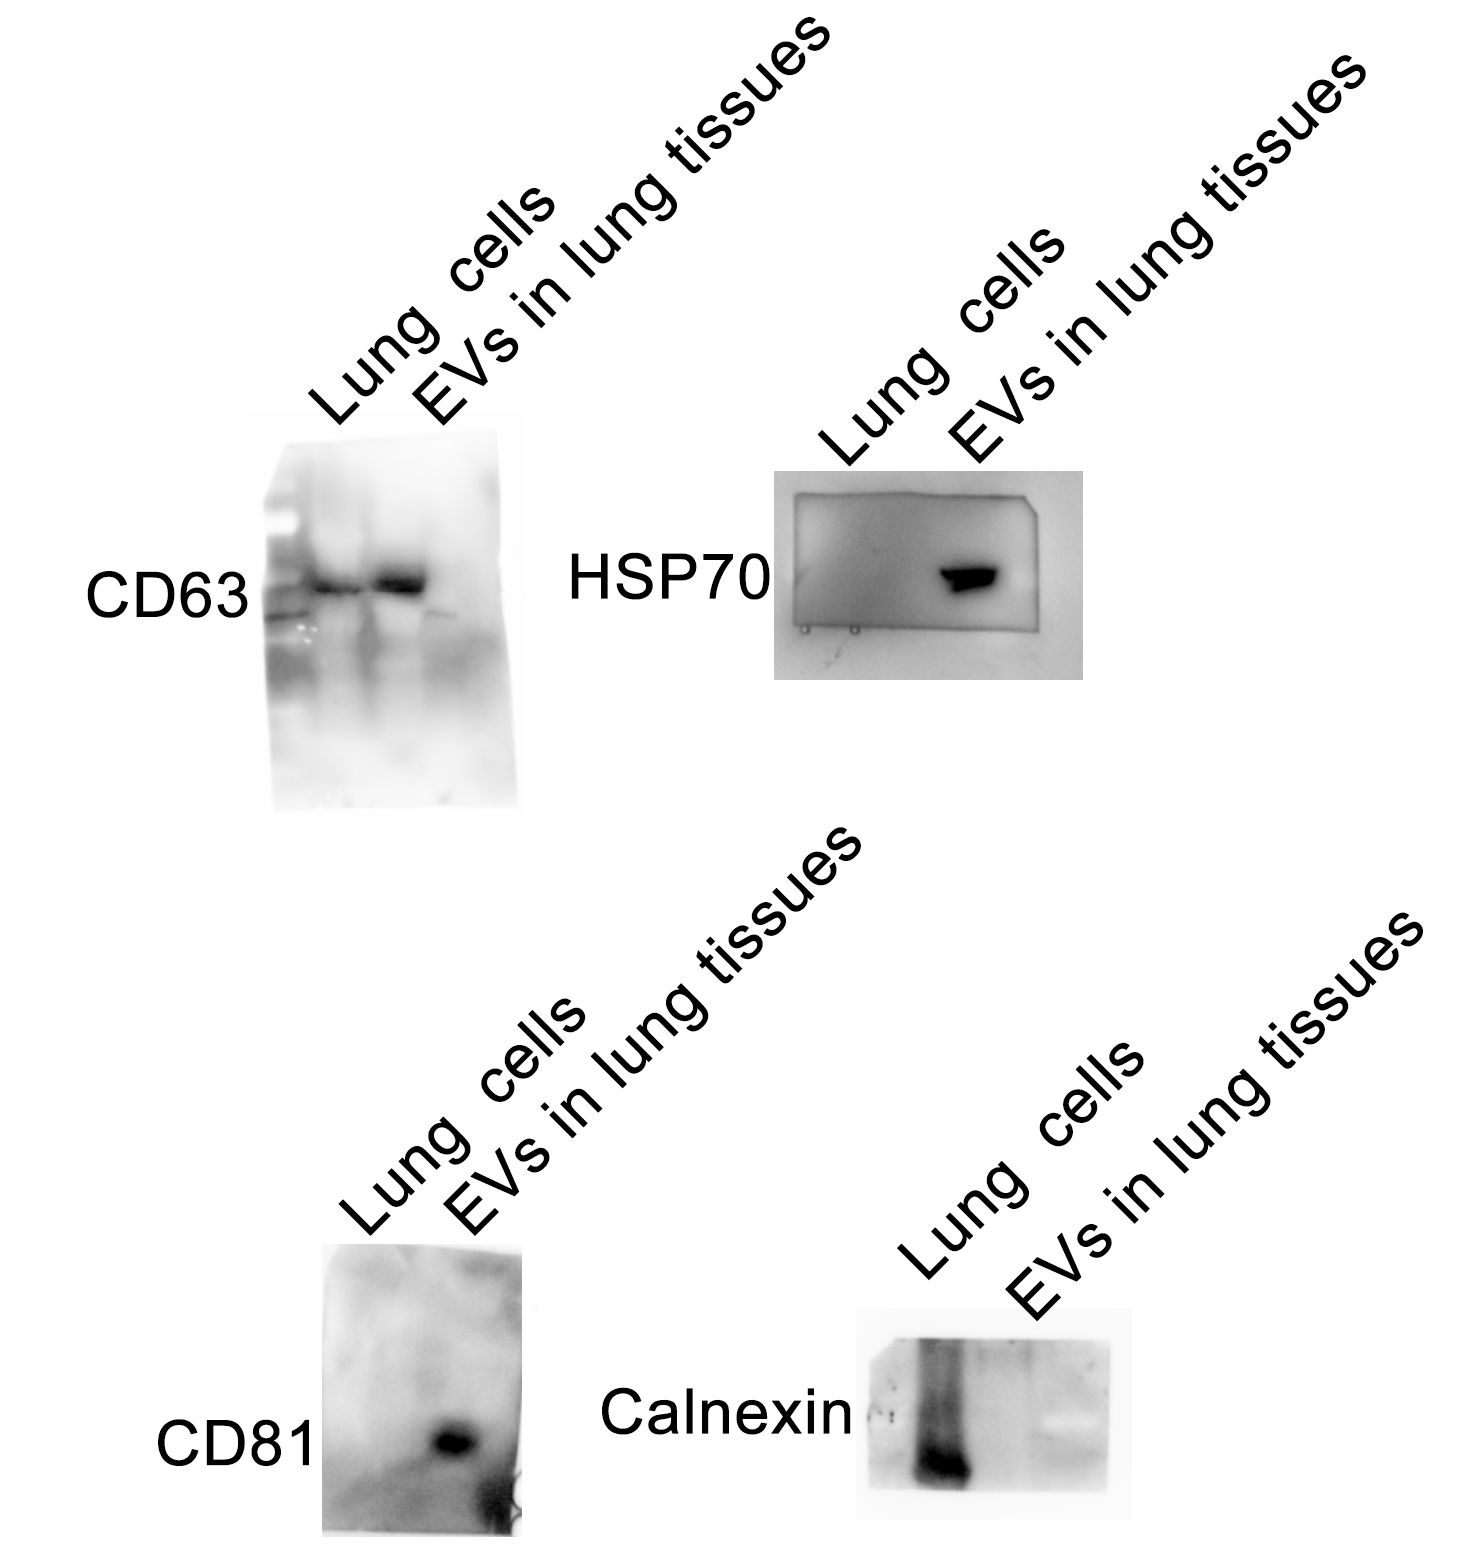
**

**Fig S6. Unedited full blots for Figure 7F.**


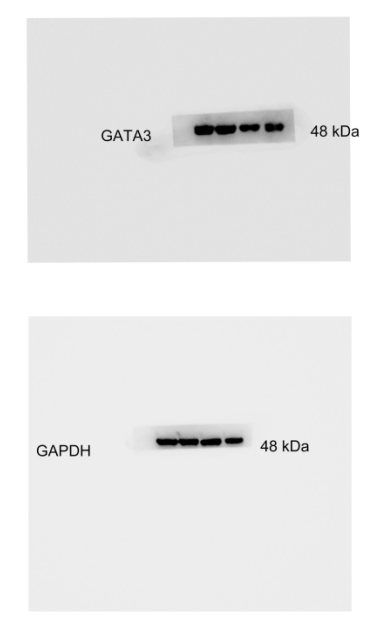


**Fig S7. Unedited full blots for Fig S1C.**


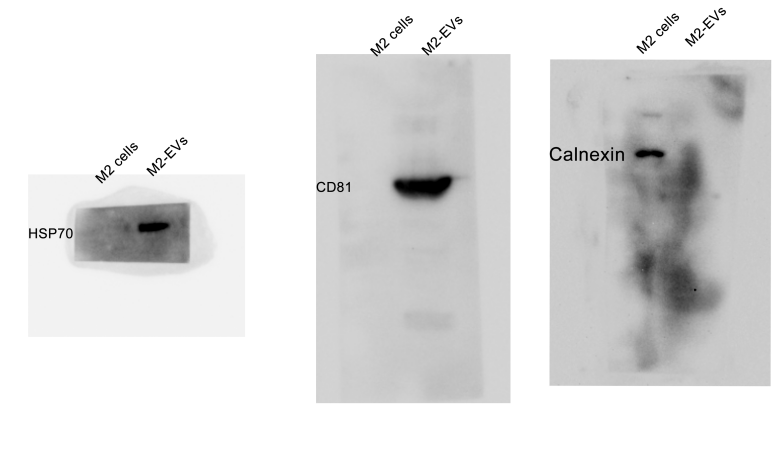

Supplement: Supplementary file 1 [file c5efef90d08d368188556ebd.docx]
